# Supplementary material for: Fundamental and Advanced Therapies, Vaccine Development against SARS-CoV-2
Source: MDPI journal article supplement (doi:10.3390/pathogens10060636), 2021-05-21
Supplement: s1 [file s1]

**Table S1.** Comparison of different vaccine types (WHO, 2020; Zimmer et al., 2020)

| <b>Vaccine name</b>             | <b>Developer</b>   | <b>Immunogen</b>            | <b>Doses</b>         | <b>Age</b> | <b>Contraindications</b>        | <b>Efficacy</b> | <b>Protection starts</b> | <b>Storage mounts (M)</b> |
|---------------------------------|--------------------|-----------------------------|----------------------|------------|---------------------------------|-----------------|--------------------------|---------------------------|
| <b>Comirnaty</b>                | BioNTech<br>Pfizer | mRNA                        | 2 (21 days apart)    | 16+        | Allergy to ingredients          | 95 %            | 7 days                   | 6 M<br>(-90°C to -60°C)   |
| <b>COVID-19 Vaccine Moderna</b> | NIAID<br>Moderna   | mRNA                        | 2 (28 days apart)    | 18+        | Allergy to ingredients          | 94.1 %          | 14 days                  | 7 M<br>(-25°C to -15°C)   |
| <b>Vaxzevria</b>                | SII<br>SKBio       | adenovirus (DNA)            | 2 (4-12 weeks apart) | 18+        | Hypersensitivity to ingredients | 82.4 %          | 15 days                  | 6 M<br>(2°C to 8°C)       |
| <b>COVID-19 Vaccine Janssen</b> | Johnson & Johnson  | adenovirus (DNA)            | 1                    | 18+        | Hypersensitivity to ingredients | 72 %            | 28 days                  | 3 M<br>(2°C to 8°C)       |
| <b>Sputnik V</b>                | GRIEM              | adenovirus (rAd26 and rAd5) | 2 (21 days apart)    | 18+        | Severe allergic reaction        | 91.6 %          | No data available        | 6 M<br>(-25°C to -15°C)   |
